# Supplementary material
Source: Springer Nature journal article supplement (https://www.springermedizin.de/resource/supplementary/13012_2010_316_MOESM2_ESM.pdf/9629814)

Identification

+

Follow-up

**Practice environment**

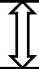

**Potential future users**

- Attitudes
- Subjective norms
- Perceived behavioural control

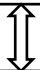

**Evidence-based intervention**

- Relative advantage
- Compatibility
- Complexity

Barriers and facilitators

Participation in  
DECISION+

Ajzen  
(1991)

Rogers  
(1962)

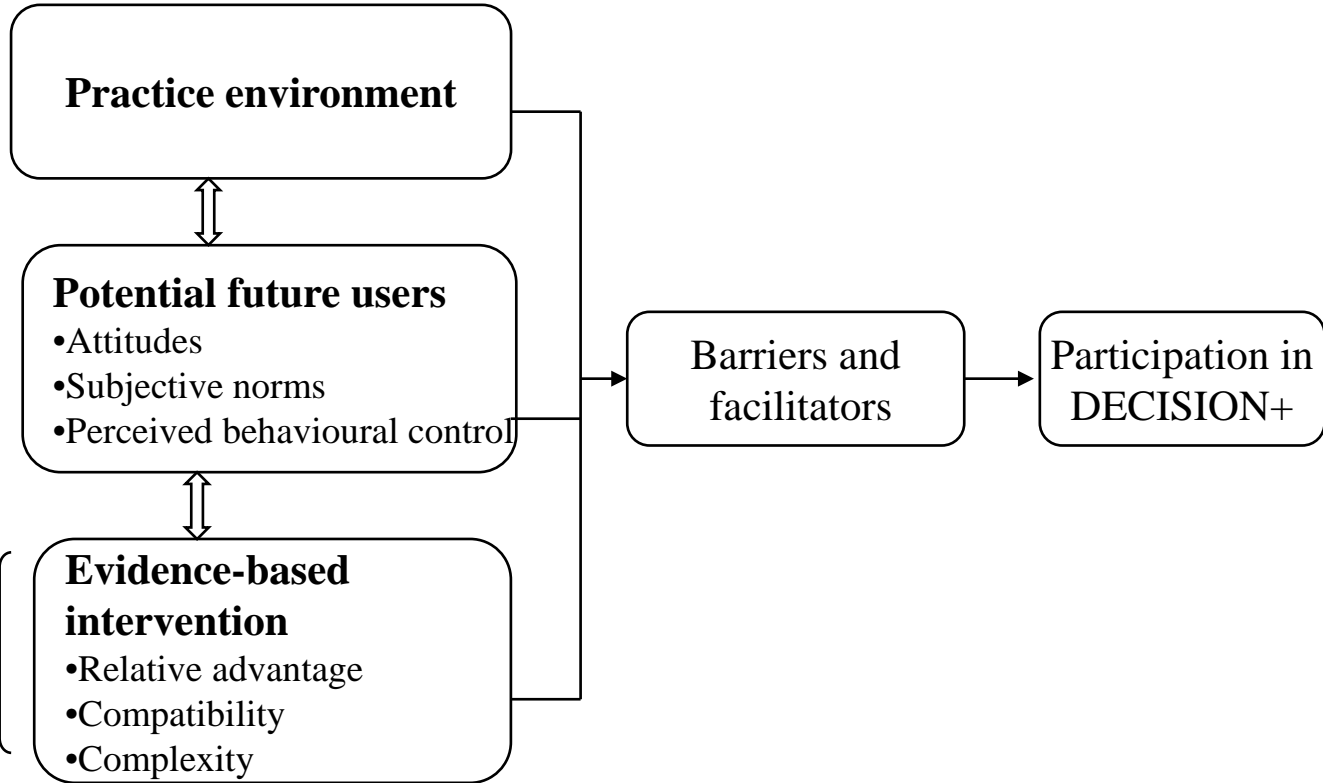

Supplement: MOESM2 [file 9629814]
